# Supplementary figures and images for: SPME-GC-MS and PTR-ToF-MS Techniques for the Profiling of the Metabolomic Pattern of VOCs and GC-MS for the Determination of the Cannabinoid Content of Three Cultivars of Cannabis sativa L. Pollen
Source: MDPI journal article supplement (doi:10.3390/molecules27248739), 2022-12-09

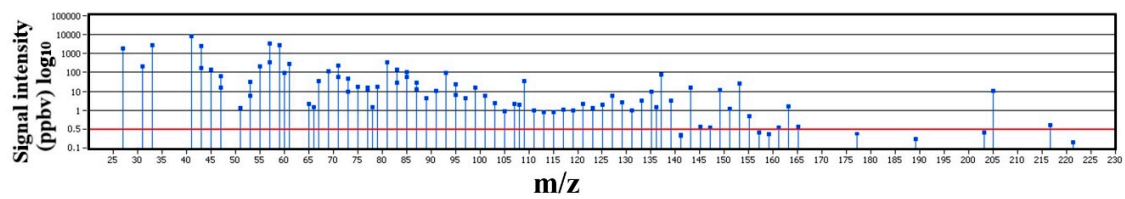

Figure S1: Spectra image.

Supplement: s1 [file s1]
